# Supplementary material
Source: PubMed Central journal article supplement (PMC3090242)
Supplement: supp_M014456_jlr.M014456-1.pdf [file supp_M014456_jlr.M014456-1.pdf]

Supplemental data

SUP. FIG. 1

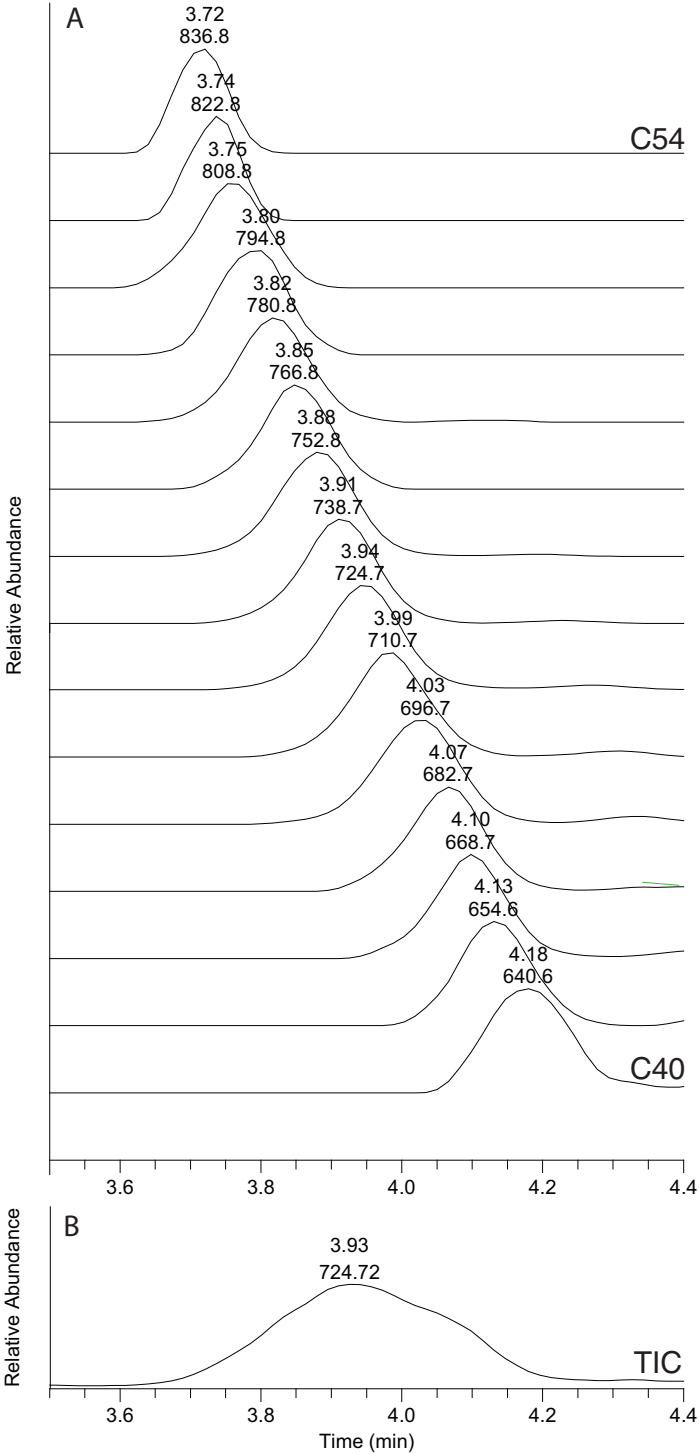

Supplementary Figure I. A) Stacked chromatograms (IEC) of the human stratum corneum CER subclass [NS]. The wide distribution in chain lengths of a single ceramide subclass (40 to 54 carbon atoms) causes the wide total ion current profile of all CER [NS] shown in B.
